# Supplementary material
Source: publisher figshare collection journal article supplement (https://acs.figshare.com/ndownloader/files/4720750)
Supplement: Supplementary file 1 [file 4720750]

# Supporting information

**Table S1. Summary of 15d-PGJ2-modified Proteins.**

| No. | Accession No. | Protein name                                                  | M.W.  | pI   | Total ion score | Seq. coverage (%) | Peptides |
|-----|---------------|---------------------------------------------------------------|-------|------|-----------------|-------------------|----------|
| 1   | gi 5031635    | cofilin 1 (non-muscle)                                        | 18491 | 8.22 | 125             | 18                | 2        |
| 2   | gi 2981750    | Chain F, Secypa Complexed With Hagpia                         | 17790 | 7.82 | 110             | 19                | 3        |
| 3   | gi 4505753    | phosphoglycerate mutase 1 (brain)                             | 28786 | 6.67 | 157             | 15                | 3        |
| 4   | gi 7669492    | glyceraldehyde-3-phosphate dehydrogenase                      | 36030 | 8.26 | 251             | 14                | 4        |
| 5   | gi 15277503   | ACTB protein                                                  | 40194 | 5.22 | 74              | 4                 | 1        |
| 6   | gi 6754994    | poly(rC) binding protein 1                                    | 37474 | 6.66 | 123             | 9                 | 2        |
| 7   | gi 4503571    | enolase 1                                                     | 47139 | 7.04 | 238             | 11                | 4        |
| 8   | gi 62896661   | eukaryotic translation elongation factor 1 $\alpha$ 1 variant | 50110 | 8.98 | 137             | 8                 | 3        |
| 9   | gi 179279     | ATP synthase beta subunit                                     | 56861 | 5.39 | 312             | 14                | 4        |
| 10  | gi 57209813   | tubulin, beta polypeptide                                     | 47736 | 4.70 | 217             | 11                | 4        |
| 11  | gi 48145673   | HNRPH1                                                        | 49099 | 5.79 | 93              | 3                 | 2        |
| 12  | -             | ND                                                            | -     | -    | -               | -                 | -        |
| 13  | gi 306890     | chaperonin (HSP60)                                            | 60986 | 5.70 | 400             | 13                | 5        |
| 14  | gi 24307939   | chaperonin containing TCP1, subunit 5 (epsilon)               | 59633 | 5.45 | 133             | 4                 | 3        |
| 15  | gi 763431     | similar to human albumin                                      | 52048 | 5.69 | 54              | 1                 | 1        |
| 17  | gi 5729877    | heat shock 70kDa protein 8 isoform 1                          | 70854 | 5.37 | 333             | 10                | 4        |
| 18  | gi 5803011    | enolase 2                                                     | 47239 | 4.91 | 55              | 5                 | 2        |
| 19  | gi 5803181    | stress-induced-phosphoprotein 1                               | 62599 | 6.40 | 53              | 2                 | 2        |

SH-SY5Y cells were rinsed with phosphate-buffered saline and scraped and homogenized in a lysis buffer (10 mM Tris-HCl, pH 7.4, 5 mM EDTA, 250 mM NaCl, 1% NP-40, and protease inhibitors). The homogenate was then centrifuged at 14,000 x *g* for 10 min at 4°C. The supernatant (1 mg/ml) was treated with 100  $\mu$ M biotinylated 15d-PGJ2 at 37°C for 1 hour. Before electrophoresis was performed, the samples were dialysed with a 2D Clean-Up Kit (GE Healthcare Bio-Sciences).

## FIGURE S1

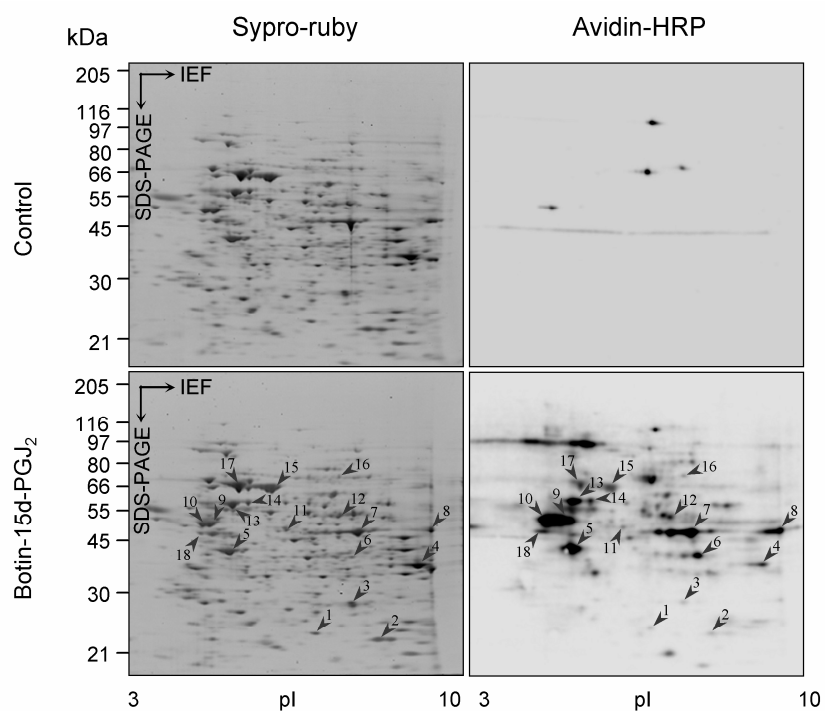

**Fig. S1. Targets of 15d-PGJ2.** SH-SY5Y cells were rinsed with phosphate-buffered saline and scraped and homogenized in a lysis buffer (10 mM Tris-HCl, pH 7.4, 5 mM EDTA, 250 mM NaCl, 1% NP-40, and protease inhibitors). The homogenate was then centrifuged at 14,000 x g for 10 min at 4°C. The supernatant (1 mg/ml) was treated with 100 uM biotinylated 15d-PGJ2 at 37°C for 1 hour. Before electrophoresis was performed, the samples were dialysed with a 2D Clean-Up Kit (GE Healthcare Bio-Sciences).
